# Supplementary material
Source: ML conference proceedings conference paper supplement (https://proceedings.mlr.press/v119/zhang20w.html)
Supplement: Supplementary file [file zhang20w-supp.pdf]

# Convex Calibrated Surrogates for the Multi-Label F-Measure

## Supplementary Material

### Implementation of ‘decode’

In order to solve the combinatorial optimization problem involved in the mapping  $\text{decode} : \mathbb{R}^{s^2+1} \rightarrow \{0, 1\}^s$  as defined in Eq. (7) efficiently, we make use of an  $O(s^3)$ -time procedure due to Dembczynski et al. (2011). Specifically, Dembczynski et al. (2011) gave a procedure that, given a certain set of  $s^2 + 1$  statistics of the true conditional distribution  $p(\mathbf{y}|x)$  at a point  $x \in \mathcal{X}$ , computes in  $O(s^3)$  time a Bayes optimal multi-label prediction  $h^*(x) \in \{0, 1\}^s$  at that point with respect to the  $F_1$ -measure by solving a similar combinatorial optimization problem (the approach generalizes easily to the  $F_\beta$ -measure for general  $\beta$ ). Our algorithm (Algorithm 2) can be viewed as effectively estimating the same  $s^2 + 1$  statistics from the training sample  $S$ ; in particular, once a scoring function  $\mathbf{f}_S : \mathcal{X} \rightarrow \mathbb{R}^{s^2+1}$  is learned by minimizing our surrogate loss  $\psi$ , the estimated statistics at a point  $x \in \mathcal{X}$  are given by  $\gamma^{-1}(\mathbf{f}_S(x))$  (where  $\gamma^{-1}$  is the inverse of the link function  $\gamma : [0, 1] \rightarrow \mathbb{R}$  associated with the strictly proper composite binary loss  $\phi$  used in our surrogate, and is applied element-wise to  $\mathbf{f}_S(x)$ ). Our ‘decode’ mapping effectively corresponds to estimating a Bayes optimal prediction at  $x$  using these estimated statistics; we can therefore apply the procedure of Dembczynski et al. (2011) to these estimated statistics.

The implementation below is described for a general input vector  $\mathbf{u} \in \mathbb{R}^{s^2+1}$  (see Eq. (7)); in our  $F_\beta$  learning algorithm, to make a prediction at  $x \in \mathcal{X}$ , it would be applied to  $\mathbf{u} = \mathbf{f}_S(x)$ . The overall idea is that the combinatorial search over  $\hat{\mathbf{y}} \in \{0, 1\}^s$  is stratified over the  $s + 1$  sets  $\hat{\mathcal{Y}}_l = \{\hat{\mathbf{y}} \in \{0, 1\}^s : \|\hat{\mathbf{y}}\|_1 = l\}$ ,  $l \in \{0, 1, \dots, s\}$ ; to find an optimal element  $\hat{\mathbf{y}}^{l,*}$  within each set  $\hat{\mathcal{Y}}_l$ , one need only solve a problem of the form  $\hat{\mathbf{y}}^{l,*} \in \operatorname{argmin}_{\hat{\mathbf{y}} \in \hat{\mathcal{Y}}_l} \sum_{j=1}^s \hat{y}_j T_{jl}$  for certain numbers  $T_{jl}$ , which can be done simply by finding the smallest  $l$  numbers among  $\{T_{jl} : j \in [s]\}$  and setting the corresponding  $l$  entries of  $\hat{\mathbf{y}}^{l,*}$  to 1 (and remaining entries to 0). Solving these  $s + 1$  subproblems and picking the best solution among them takes a total of  $O(s^2 \ln(s))$  time; computing the  $s^2$  numbers  $T_{jl}$  involves a matrix multiplication that takes a total of  $O(s^3)$  time.<sup>7</sup>

---

#### Algorithm 2 Decode

---

- 1: **Input:** Vector  $\mathbf{u} = (u_0, (u_{jk})_{j,k=1}^s)^\top \in \mathbb{R}^{s^2+1}$
- 2: **Parameters:** Link function  $\gamma : [0, 1] \rightarrow \mathbb{R}$
- 3: Define matrices  $\mathbf{Q} \in [0, 1]^{s \times s}$  and  $\mathbf{V} \in \mathbb{R}^{s \times s}$  as follows:

$$\begin{aligned} Q_{jk} &= \gamma^{-1}(u_{jk}) \\ V_{kl} &= \frac{-(1+\beta)^2}{\beta^2 k + l} \end{aligned}$$

- 4: Compute  $\mathbf{T} = \mathbf{QV}$  // matrix multiplication,  $O(s^3)$  time
- 5: **For**  $l = 1 \dots s$ : // for loop takes total  $O(s^2 \ln(s))$  time
- 6: Find the  $l$  smallest numbers among  $\{T_{jl} : j \in [s]\}$ ; call the corresponding indices  $j_1^l, \dots, j_l^l$
- 7: Define  $\hat{\mathbf{y}}^{l,*} \in \{0, 1\}^s$  as follows:

$$\hat{y}_j^{l,*} = \begin{cases} 1 & \text{if } j \in \{j_1^l, \dots, j_l^l\} \\ 0 & \text{otherwise.} \end{cases} \quad // \text{ this solves } \hat{\mathbf{y}}^{l,*} \in \operatorname{argmin}_{\hat{\mathbf{y}} \in \hat{\mathcal{Y}}_l} \sum_{j=1}^s \hat{y}_j T_{jl}$$

- 8: Set  $z_l^* = \sum_{j=1}^s \hat{y}_j^{l,*} T_{jl}$
- 9: **End for**
- 10: Pick  $\hat{\mathbf{y}}^* \in \{0, 1\}^s$  as follows:

$$\hat{\mathbf{y}}^* \in \operatorname{argmin}_{\hat{\mathbf{y}} \in \{\mathbf{0}, \hat{\mathbf{y}}^{1,*}, \dots, \hat{\mathbf{y}}^{s,*}\}} - \mathbf{1}(\hat{\mathbf{y}} = \mathbf{0}) \cdot \gamma^{-1}(u_0) + \mathbf{1}(\hat{\mathbf{y}} \neq \mathbf{0}) \cdot z_{\|\hat{\mathbf{y}}\|_1}^*$$

- 11: **Output:**  $\hat{\mathbf{y}}^* \in \{0, 1\}^s$
- 

<sup>7</sup>One could in principle use faster matrix multiplication methods that take  $o(s^3)$  time, but in practice, this would be helpful for only extremely large values of  $s$ .
